# Supplementary material
Source: publisher figshare collection journal article supplement (https://acs.figshare.com/ndownloader/files/3776092)
Supplement: Supplementary file 1 [file 3776092]

# Supporting Information

## A General Route to Optically Transparent Highly Filled Polymer Nanocomposites.

Sascha Ehlert,<sup>†</sup> Corinna Stegelmeier,<sup>†</sup> Daniela Pirner,<sup>†</sup> Stephan Förster\*<sup>†</sup>

<sup>†</sup> Physical Chemistry I, University of Bayreuth, Germany

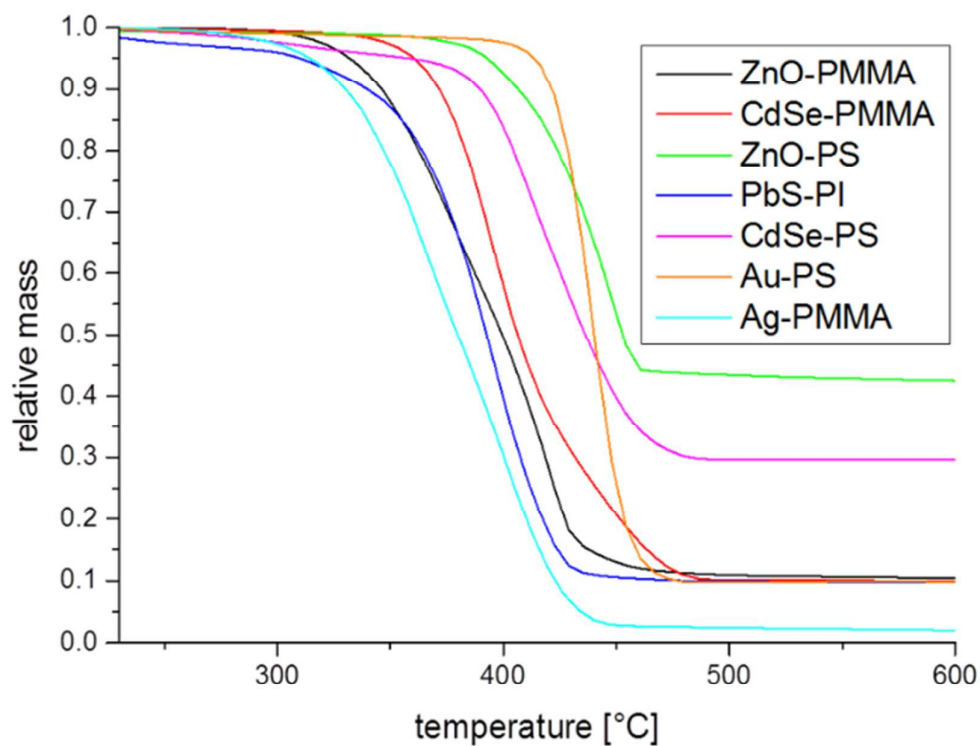

**Figure S1.** TGA measurements of all investigated nanocomposites.

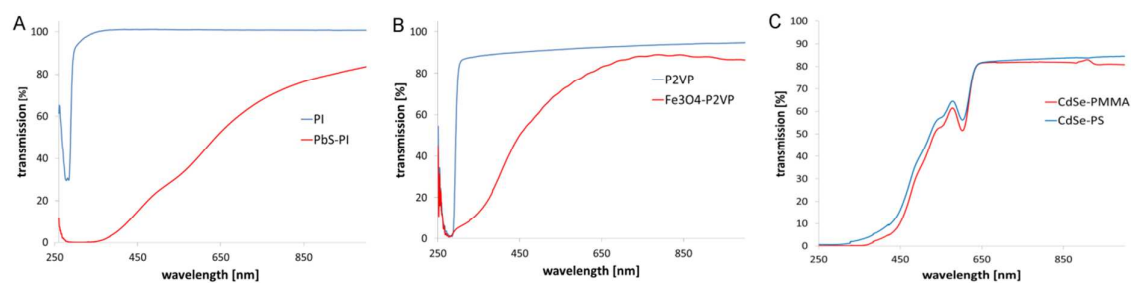

**Figure S2.** UV-vis spectra of PbS-PI (A), iron oxide  $\text{Fe}_2\text{O}_3$ -P2VP (B), and CdSe-PMMA (C) nanocomposites with high transmission.

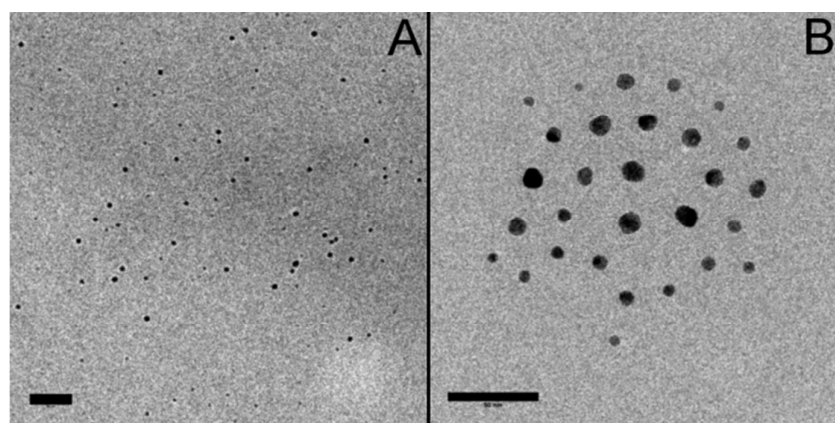

**Figure S3.** TEM-images of solvent cast Ag-PMMA (A, 15nm, 2%) and Au-PI (B, 15nm, 10%) nanocomposites (scale bars are 50 nm).

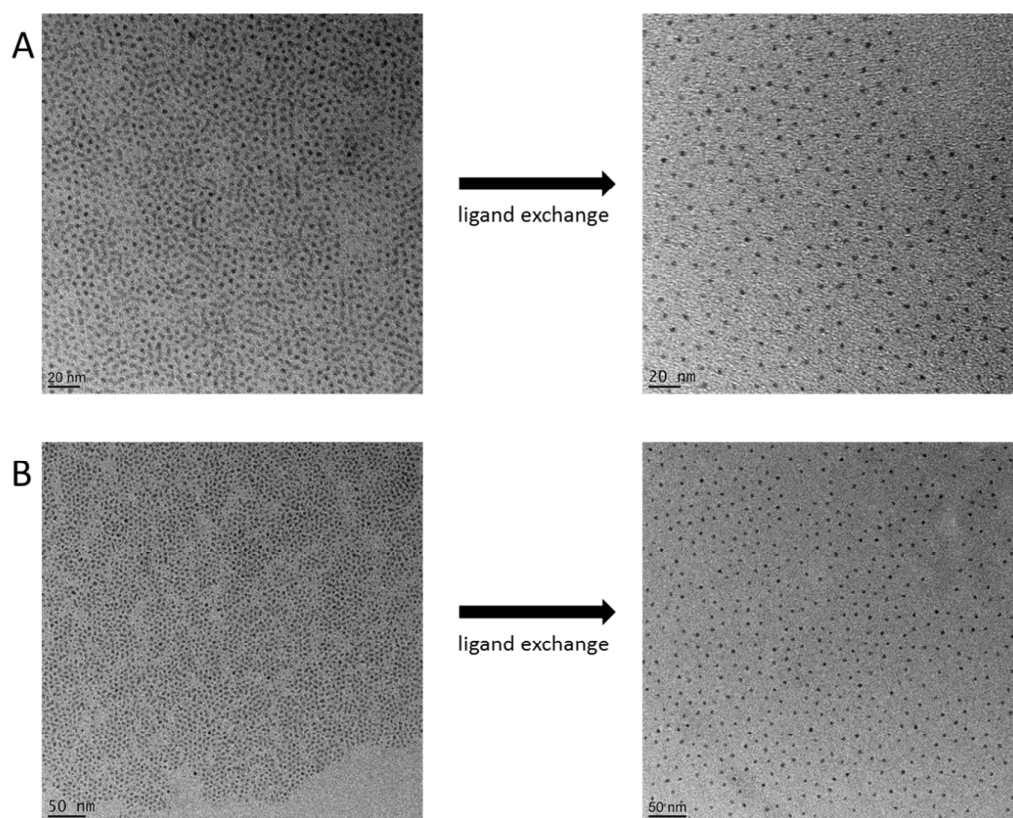

**Figure S4.** TEM-images of CdSe-nanoparticles (A) and PbS-nanoparticles (B) before (left) and after the ligand exchange (right) with polystyrene (A) and polyisoprene (B).

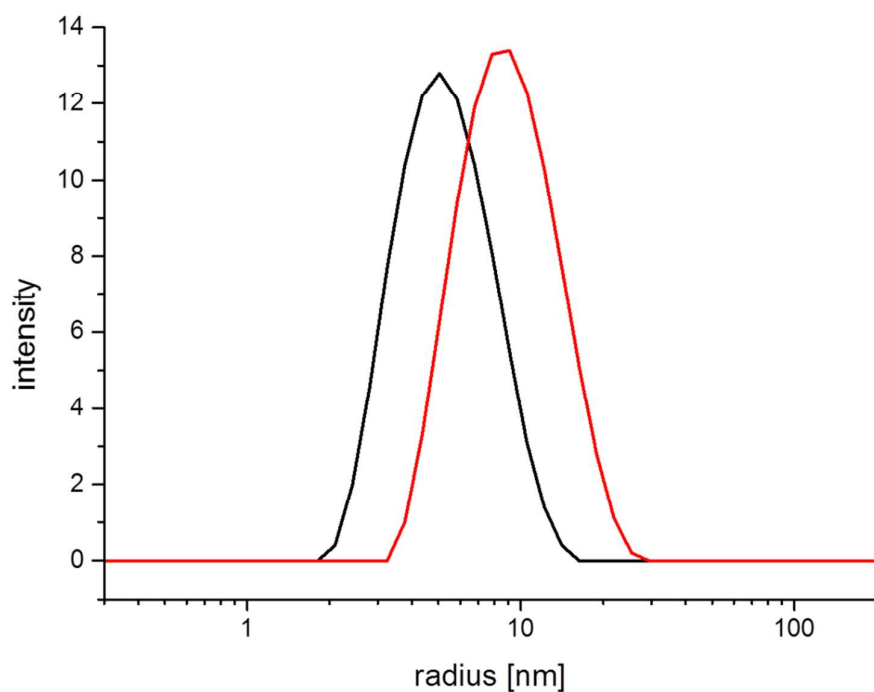

**Figure S5.** Size distribution of CdSe-nanoparticles (black) and CdSe-nanoparticles coated with a PS-polymer brush (red) as measured by dynamic light scattering (DLS).

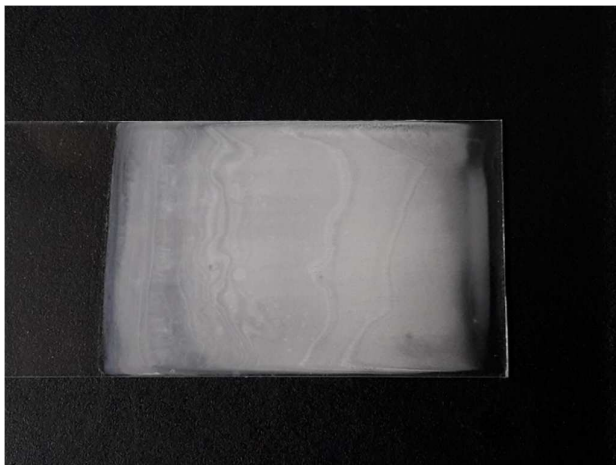

**Figure S6.** Photo of a 10 wt% ZnO/PS-nanocomposite thin film where the ZnO nanoparticles were coated with oleic acid instead of a polystyrene brush layer. The incompatibility and aggregation of the nanoparticles in the PS (8600 g/ml) matrix are causing pronounced turbidity.
